# Supplementary material for: A facile approach for the synthesis of copper(ii) myristate strips and their electrochemical activity towards the oxygen reduction reaction
Source: Royal Society of Chemistry journal article supplement (doi:10.1039/c5ra22986c), 2016-01-01
Supplement: c5ra22986c1.pdf [file c5ra22986c1.pdf]

# Supporting Information

## A Facile Approach for Synthesis of Copper (II) myristate strips and its Electrochemical Activity towards Oxygen Reduction Reaction

Indrani Mukherjee,<sup>a,b</sup> Aneeya K. Samantara,<sup>a,c</sup> Satyajit Ratha,<sup>d</sup> Bimal P Singh,<sup>a</sup> Bikash Kumar Jena<sup>a,\*</sup> and Sriparna Chatterjee<sup>a,\*</sup>

<sup>a</sup> CSIR-Institute of Minerals and Materials Technology, Acharya Vihar, Bhubaneswar, 751 013, India

<sup>b</sup> National Institute of Technology, Durgapur 713209, India

<sup>c</sup> Academy of Scientific & Innovative Research, New Delhi 110001, India

<sup>d</sup> Indian Institute of Technology, Bhubaneswar 751007, India

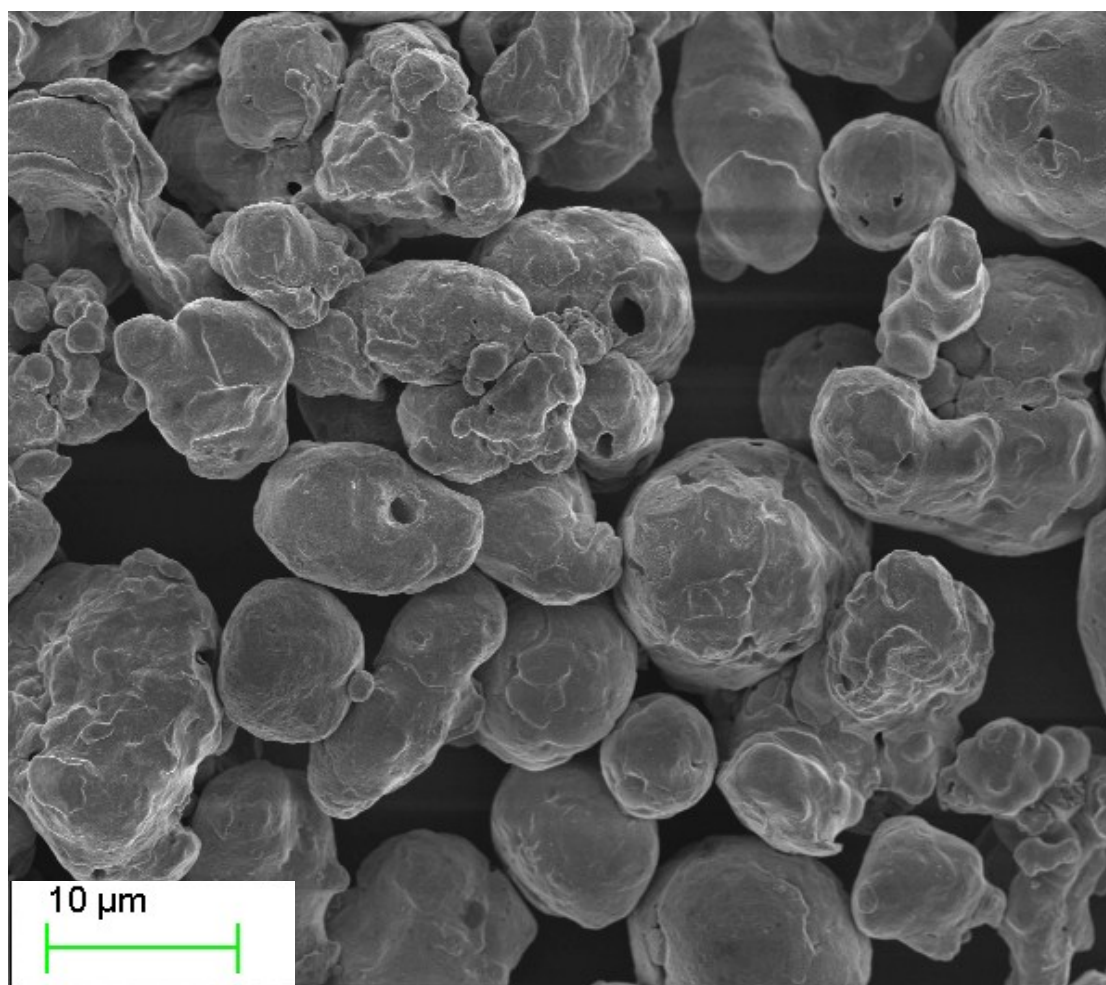

Figure S1: SEM of copper powder.

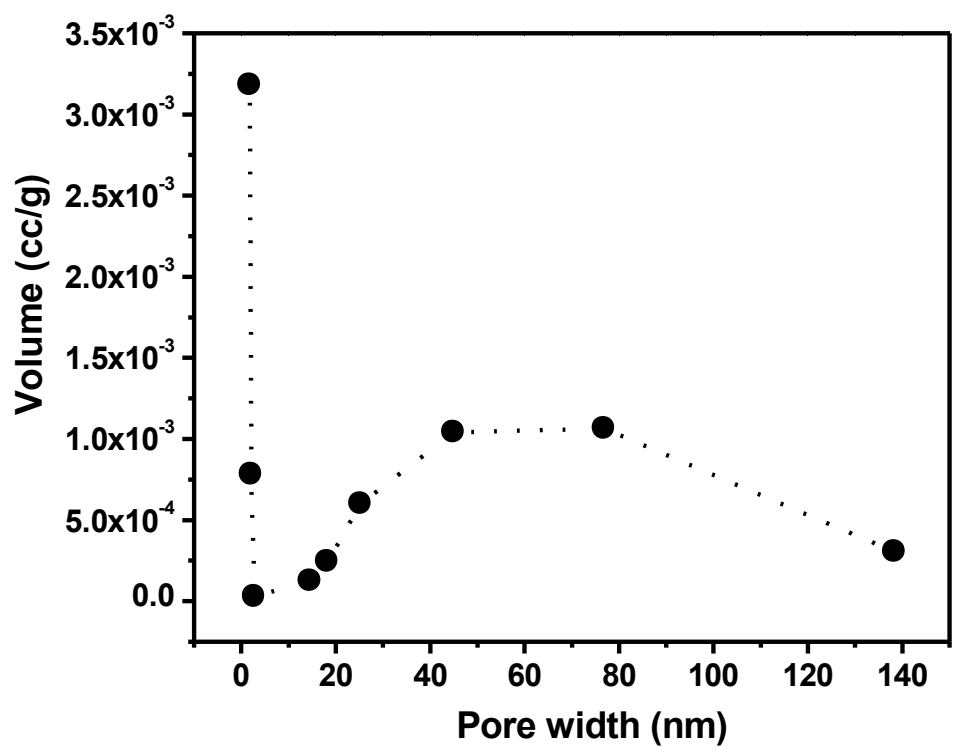

**Figure S2: Pore width distribution of Copper (II) myristate strips as calculated using BJH method**

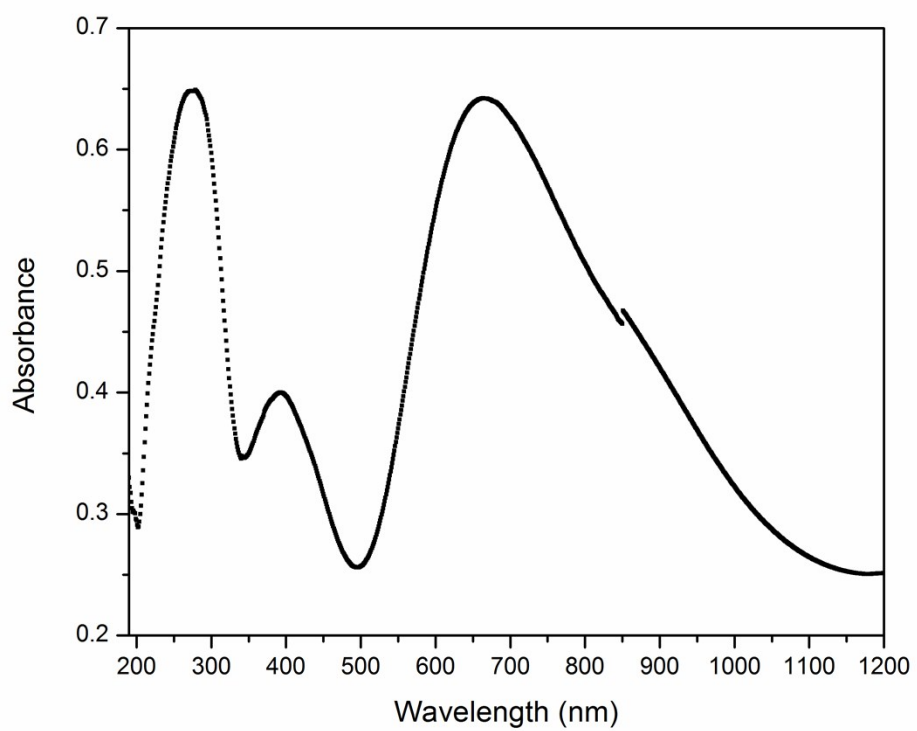

**Figure S3: DR-UV-Vis spectrum of Copper (II) myristate strips.**
